# Supplementary material for: Hybrid polymer–liquid lithium ion electrolytes: effect of porosity on the ionic and molecular mobility
Source: Royal Society of Chemistry journal article supplement (doi:10.1039/d3ta00250k), 2023-01-01
Supplement: d3ta00250k1.pdf [file d3ta00250k1.pdf]

## Supplementary Information

### Hybrid polymer-liquid electrolytes for lithium-ion batteries: effect of porosity on the ionic and molecular mobility.

*Martina Cattaruzza*<sup>1</sup>, *Yuan Fang*<sup>2</sup>, *István Furó*<sup>2</sup>, *Göran Lindbergh*<sup>3</sup>, *Fang Liu*<sup>4</sup>, *Mats Johansson*<sup>1\*</sup>

<sup>1</sup>*Division of Coating Technology, Department of Fibre and Polymer Technology, KTH Royal Institute of Technology, SE-100 44 Stockholm, Sweden*

<sup>2</sup>*Division of Applied Physical Chemistry, Department of Chemistry, KTH Royal Institute of Technology, SE-100 44 Stockholm, Sweden*

<sup>3</sup>*Division of Applied Electrochemistry, Department of Chemical Engineering, KTH Royal Institute of Technology, SE-100 44 Stockholm, Sweden*

<sup>4</sup>*Division of Materials and Manufacture, Department of Industrial and Materials Science, Chalmers University of Technology, SE-412 96 Gothenburg, Sweden*

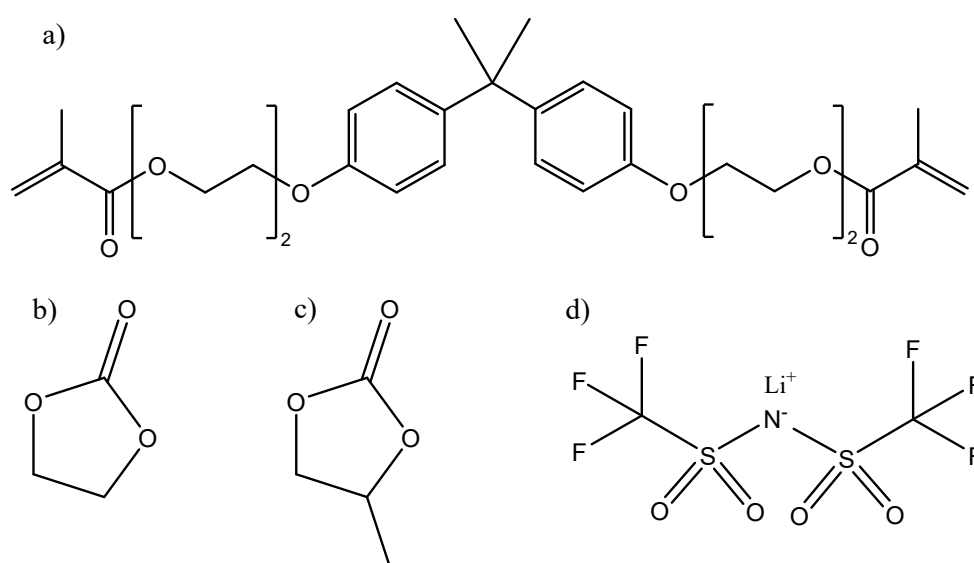

**Figure S1:** The chemical structure of the main chemicals used in this study: a) monomer Bisphenol A ethoxylate dimethacrylate (BPAMA), b) ethylene carbonate (EC), c) propylene carbonate (PC), d) LiTFSI salt.

- **Conversion calculation of the acrylate groups with FTIR analysis**

The conversions of the acrylate groups with FTIR for all the different formulations was calculated as following:

$$\text{Conversion} = \left( 1 - \frac{A_{\text{resin}, C=0} * A_{\text{film}, C=C}}{A_{\text{resin}, C=C} * A_{\text{film}, C=0}} \right) * 100$$

where  $A_{\text{resin, C=O}}$  is the absorbance area of the carbonyl peak of the ester group at  $1715\text{ cm}^{-1}$  of the uncured resin,  $A_{\text{film, C=C}}$  is the absorbance area of the vinyl peak at  $1637\text{ cm}^{-1}$  of the cured film,  $A_{\text{resin, C=C}}$  is the absorbance area of the vinyl peak at  $1637\text{ cm}^{-1}$  of the uncured resin and  $A_{\text{film, C=O}}$  is the absorbance area of the carbonyl peak of the ester group at  $1715\text{ cm}^{-1}$  of the cured film.

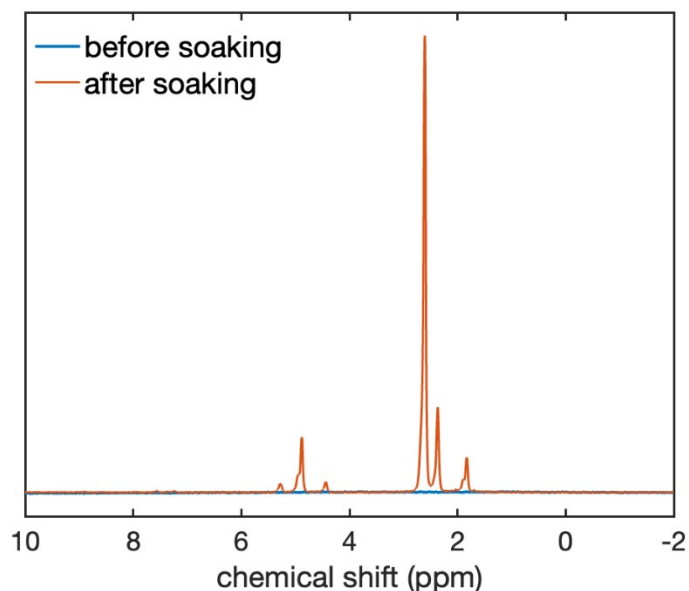

**Figure S2:**  $^1\text{H}$  NMR spectra of the sample with pBPAMA as is (blue) and after having the pBPAMA soaked in acetonitrile (orange).

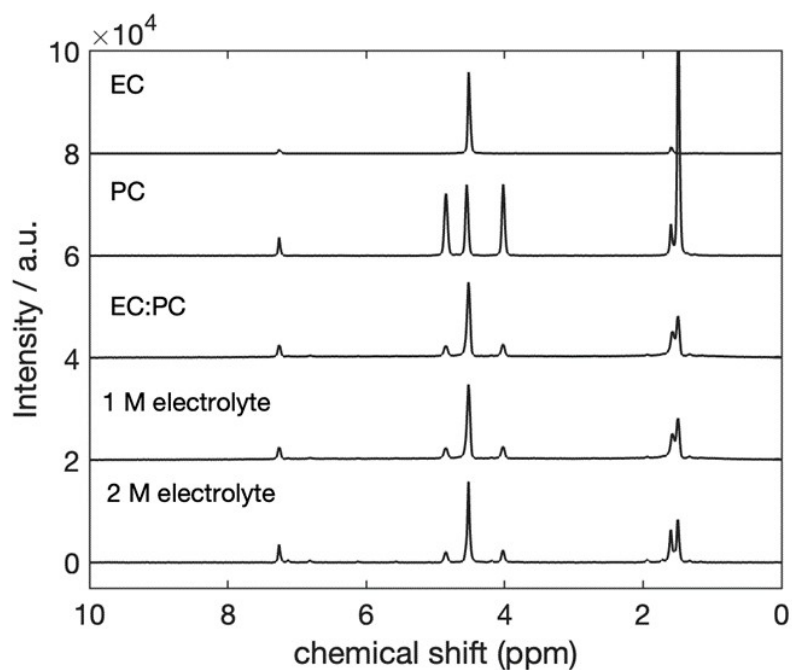

**Figure S3:**  $^1\text{H}$  NMR spectra of pure EC, pure PC, a mixture of EC:PC (1:1 wt%), 1 M LiTFSI in EC:PC (1:1 wt%), 2 M LiTFSI in EC:PC (1:1 wt%). In the EC:PC 1:1 wt%, the NMR peak at 4.52 ppm is contributed by EC and PC molecules at the molar ratio of 4.6:1.

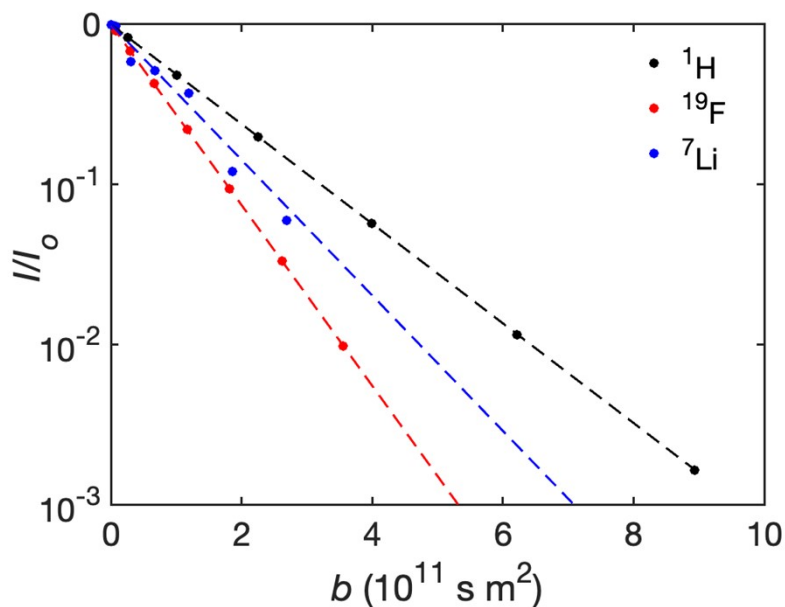

**Figure S4:** The diffusional decay obtained in different molecular components in the HE 50 wt% sample.  $^1\text{H}$  signal is from the solvent (the peak at 4.52 ppm, methylene groups from both EC and PC, see Figure S2), the  $^{19}\text{F}$  signal is from the anion and the  $^7\text{Li}$  signal is from the cation.  $b$  is  $\gamma^2 \delta^2 g^2 \left( \Delta - \frac{\delta}{3} \right)$ .  $I$  and  $I_0$  are the signal intensities with and without gradient, respectively.

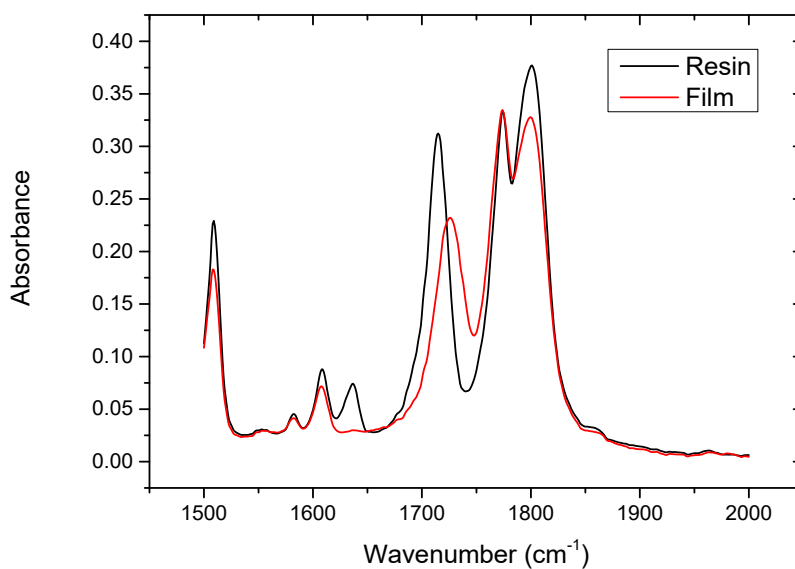

**Figure S5:** FTIR spectra of the resin (before curing) and of the film (after curing) showing the disappearance of the vinyl stretch peak at  $1637\text{ cm}^{-1}$  for HE 40 wt%.

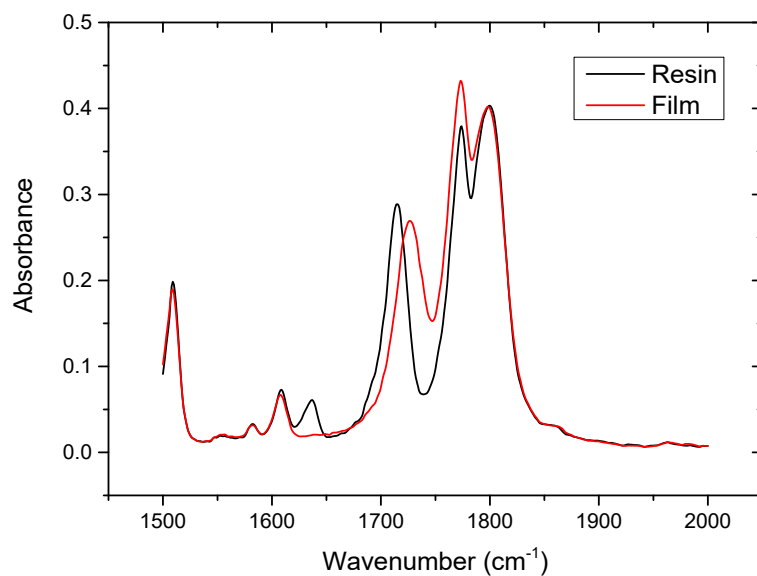

**Figure S6:** FTIR spectra of the resin (before curing) and of the film (after curing) showing the disappearance of the vinyl stretch peak at 1637 cm<sup>-1</sup> for HE 45 wt%.

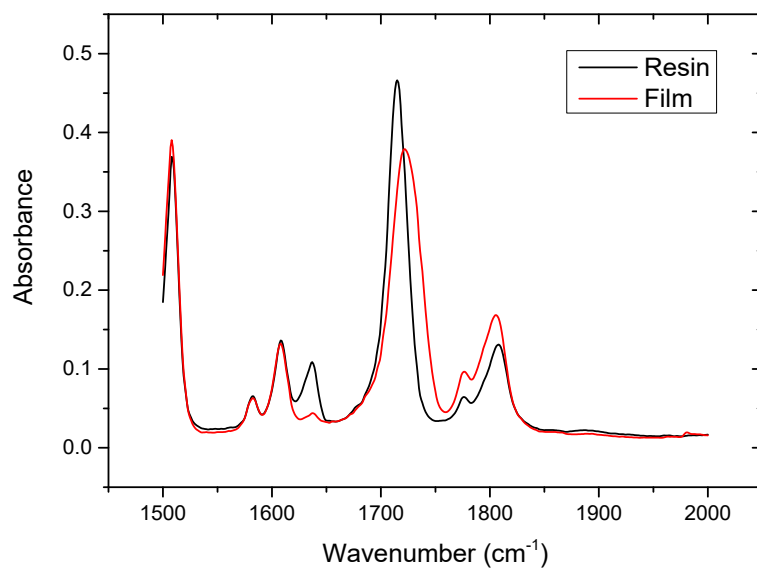

**Figure S7:** FTIR spectra of the resin (before curing) and of the film (after curing) showing the disappearance of the vinyl stretch peak at 1637 cm<sup>-1</sup> for pBPAMA.

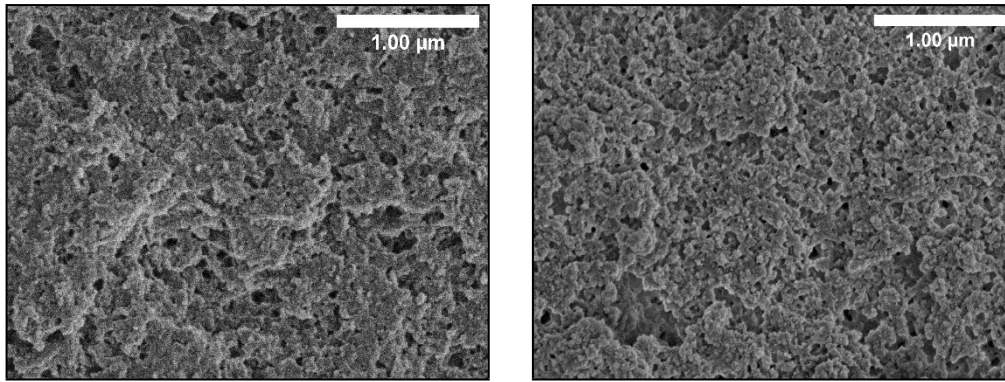

**Figure S8:** Cross-sectional SEM micrographs of cryo-fractured HE 45 wt% (left) and of HE 50 wt% (right). All samples were dried beforehand.

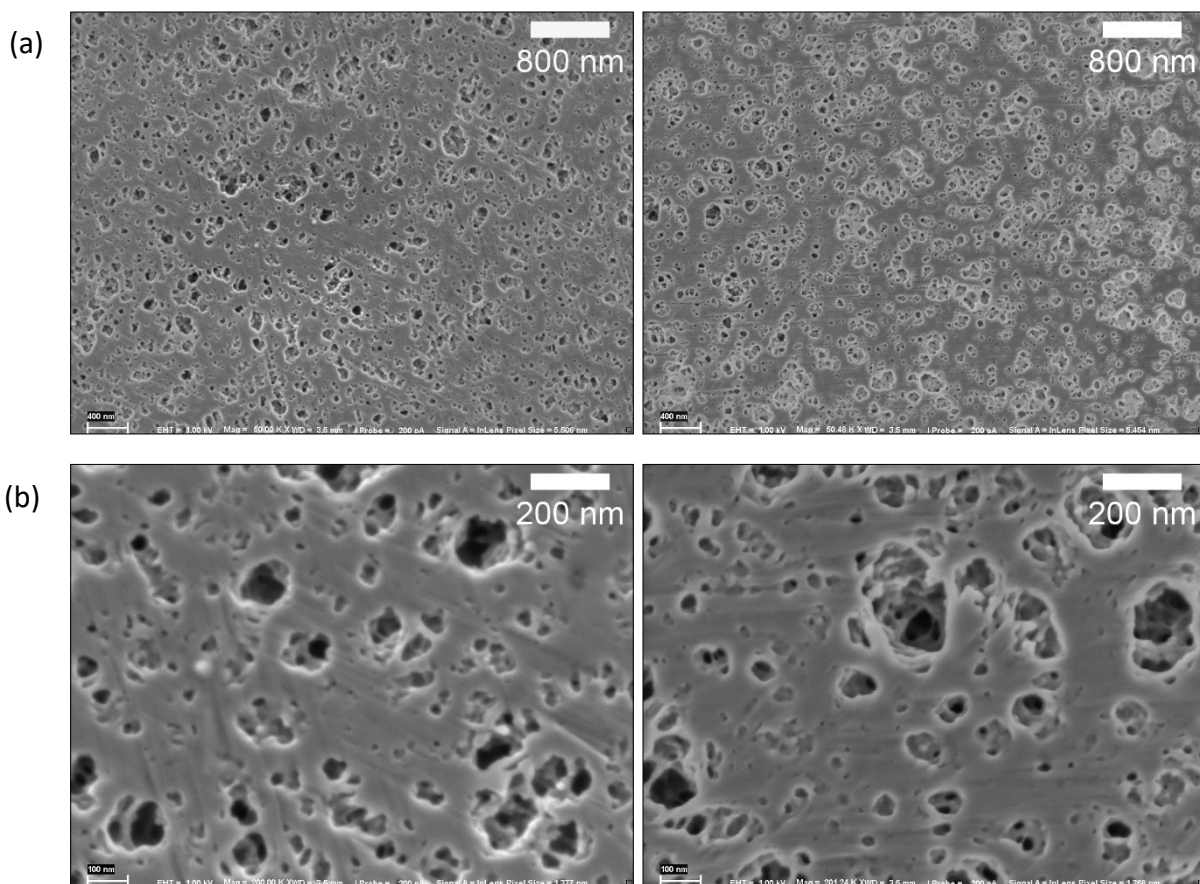

**Figure S9:** BIB-SEM images of HE 40 wt% (left) vs HE 50 wt% (right) electrolyte content HEs at different magnifications (a) 50k (b) 200 k.

- **Calculation of the absorbed LiTFSI in soaked pBPAMA**

The concentration of absorbed LiTFSI was calculated as following:

In Table 3 we detected 1.11 mg PC and 1.16 mg EC released from pBPAMA soaked in 1 M electrolytes. The density of PC:EC 50 /50 v/v was taken as 1.007 g/ml, thus the total volume of PC/EC mixture is

$$\frac{1.11 + 1.16}{1.0069} = 2.254 \mu L$$

The LiTFSI released from the same sample was 0.21 mg (Table 3). The molecular weight of LiTFSI is 287.09 g/mol. Thus its concentration in the released PC/EC is  $\frac{0.21 \times 10^{-3}}{287.09 \times 2.254 \times 10^{-6}} = 0.32 M$ .

Similarly, the concentration of absorbed LiTFSI in EC/PC for the pBPAMA soaked in 2M electrolytes was calculated as

$$\frac{1.20 + 1.22}{1.0069} = 2.403 \mu L$$

$$\frac{0.16 \times 10^{-3}}{287.09 \times 2.403 \times 10^{-6}} = 0.23 M$$

**Table S1:**  $^1\text{H}$  (solvent)<sup>a</sup>,  $^{19}\text{F}$  (anion) and  $^7\text{Li}$  (cation) self-diffusion coefficients of the different electrolyte formulations

| Samples    | Average Conductivity<br>( $\text{S}\cdot\text{cm}^{-1}$ ) | Diffusion coefficients ( $10^{-12} \text{ m}^2/\text{s}$ ) |                 |               |
|------------|-----------------------------------------------------------|------------------------------------------------------------|-----------------|---------------|
|            |                                                           | $^1\text{H}$                                               | $^{19}\text{F}$ | $^7\text{Li}$ |
| 1 M LiTFSI | $4.35 \times 10^{-3}$                                     | 241                                                        | 153             | 108           |
| HE 40 wt   | $3.66 \times 10^{-5}$                                     | 0.86                                                       | 2.28            | 1.19          |
| HE 45 wt%  | $1.36 \times 10^{-4}$                                     | 2.25                                                       | 6.23            | 3.50          |
| HE 50 wt%  | $2.94 \times 10^{-4}$                                     | 7.17                                                       | 13.0            | 9.75          |

<sup>a</sup>The 4.52 ppm  $^1\text{H}$  peak (see Figure S2) was used to follow the solvent behavior. In the 1:1 solvent mixture, the diffusion coefficient of PC obtained from the diffusional decay of the 1.5 ppm peak is  $2.24 \times 10^{-12} \text{ m}^2/\text{s}$ . The overlapping EC/PC peak 4.52 ppm provides a diffusional decay that yields a diffusion coefficient of  $2.44 \times 10^{-12} \text{ m}^2/\text{s}$ . Since this latter peak is contributed in intensity by roughly 80% by EC, the EC diffusion coefficient in the 1:1 mixture is roughly  $2.5 \times 10^{-12} \text{ m}^2/\text{s}$ . Hence, the transport properties of the EC and PC molecules in the mixed solvent are roughly the same.
